# Supplementary material for: NMR Metabolomics and Chemometrics of Commercial Varieties of Phaseolus vulgaris L. Seeds from Italy and In Vitro Antioxidant and Antifungal Activity
Source: MDPI journal article supplement (doi:10.3390/plants13020227), 2024-01-13
Supplement: s1 [file s1]

# SUPPORTING INFORMATION

## NMR Metabolomics and Chemometrics of Commercial Varieties of *Phaseolus vulgaris* L. Seeds from Italy and In Vitro Antioxidant and Antifungal Activity

Vadym Samukha <sup>1,†</sup>, Francesca Fantasma <sup>1,†</sup>, Gilda D'Urso <sup>2</sup>, Claudio Caprari <sup>1</sup>, Vincenzo De Felice <sup>1</sup>, Gabriella Saviano <sup>1</sup>, Gianluigi Lauro <sup>2</sup>, Agostino Casapullo <sup>2</sup>, Maria Giovanna Chini <sup>1,\*</sup>, Giuseppe Bifulco <sup>2,\*</sup> and Maria Iorizzi <sup>1</sup>

<sup>1</sup> Department of Biosciences and Territory, University of Molise, Contrada Fonte Lappone, 86090 Isernia, Italy; v.samukha@studenti.unimol.it (V.S.); fantasma@unimol.it (F.F.); claudio.caprari@unimol.it (C.C.); defelice@unimol.it (V.D.F.); saviano@unimol.it (G.S.); iorizzi@unimol.it (M.I.)

<sup>2</sup> Department of Pharmacy, University of Salerno, Via Giovanni Paolo II 132, 84084 Salerno, Italy; gidurso@unisa.it (G.D.); glauro@unisa.it (G.L.); casapullo@unisa.it (A.C.)

\* Correspondence: mariagiovanna.chini@unimol.it (M.G.C.); bifulco@unisa.it (G.B.); Tel.: +39-0874404132 (M.G.C.); +39-089969741 (G.B.)

<sup>†</sup> These authors contributed equally to this work.

### Table of contents

|                                                                                                                                                                                                                         |   |
|-------------------------------------------------------------------------------------------------------------------------------------------------------------------------------------------------------------------------|---|
| Figure S1. <sup>1</sup> H-NMR spectrum in D <sub>2</sub> O of polar extract of <i>Phaseolus</i> Cannellino (PCANN) at 600 MHz.                                                                                          | 3 |
| Figure S2. <sup>1</sup> H-NMR spectrum in D <sub>2</sub> O of polar extract of <i>Phaseolus</i> Controne (PCON) at 600 MHz. ...                                                                                         | 3 |
| Figure S3. <sup>1</sup> H-NMR spectrum in D <sub>2</sub> O of polar extract of <i>Phaseolus</i> Occhio Nero (PON) at 600 MHz.                                                                                           | 4 |
| Figure S4. <sup>1</sup> H- <sup>1</sup> H-COSY NMR spectrum in D <sub>2</sub> O of polar extract of <i>Phaseolus</i> Vellutina (PVEL) at 600 MHz.                                                                       | 4 |
| Figure S5. HSQC spectrum in D <sub>2</sub> O of polar extract of <i>Phaseolus</i> Vellutina (PVEL) at 600 MHz. ....                                                                                                     | 5 |
| Figure S6. HMBC spectrum in D <sub>2</sub> O of polar extract of <i>Phaseolus</i> Vellutina (PVEL) at 600 MHz. ....                                                                                                     | 5 |
| Figure S7. Chemical structure of selected metabolites of both polar and apolar extract of <i>Phaseolus</i> seeds, namely Tyrosine (13, Tyr), Tryptophan (14, Trp), Pipecolic acid (23, Pip) and Trigonelline (28, Tri). | 6 |
| Figure S8. <sup>1</sup> H-NMR spectrum in CDCl <sub>3</sub> of apolar extract of <i>Phaseolus</i> Cannellino (PCANN) at 600 MHz.                                                                                        | 6 |
| Figure S9. <sup>1</sup> H-NMR spectrum in CDCl <sub>3</sub> of apolar extract of <i>Phaseolus</i> Controne (PCON) at 600 MHz.                                                                                           | 7 |

|                                                                                                                                                                                                       |    |
|-------------------------------------------------------------------------------------------------------------------------------------------------------------------------------------------------------|----|
| Figure S10. $^1\text{H}$ -NMR spectrum in $\text{CDCl}_3$ of apolar extract of <i>Phaseolus</i> Occhio Nero (PON) at 600 MHz.....                                                                     | 7  |
| Figure S11. $^1\text{H}$ - $^1\text{H}$ -COSY NMR spectrum in $\text{CDCl}_3$ of apolar extract of <i>Phaseolus</i> Vellutina (PVEL) at 600 MHz.....                                                  | 8  |
| Figure S12. HSQC spectrum in $\text{CDCl}_3$ of apolar extract of <i>Phaseolus</i> Vellutina (PVEL) at 600 MHz .                                                                                      | 8  |
| Figure S13. HMBC spectrum in $\text{CDCl}_3$ of apolar extract of <i>Phaseolus</i> Vellutina (PVEL) at 600 MHz.                                                                                       | 9  |
| Figure S14. 2D representation of Principal Component Analysis (PCA) of polar extracts of bean varieties. PCANN (red), PCON (green), PVEL (yellow) and PON (blue) are separated in the score plot..... | 9  |
| Figure S15. Partial Least Square – Discriminant Analysis (PLS-DA) of the selected metabolites of polar extracts. ....                                                                                 | 10 |
| Figure S16. Loading Plot of PLS-DA.....                                                                                                                                                               | 10 |
| Figure S17. a) Variable Importance in Projection on component 1. b) Variable Importance in Projection on component 2.....                                                                             | 11 |

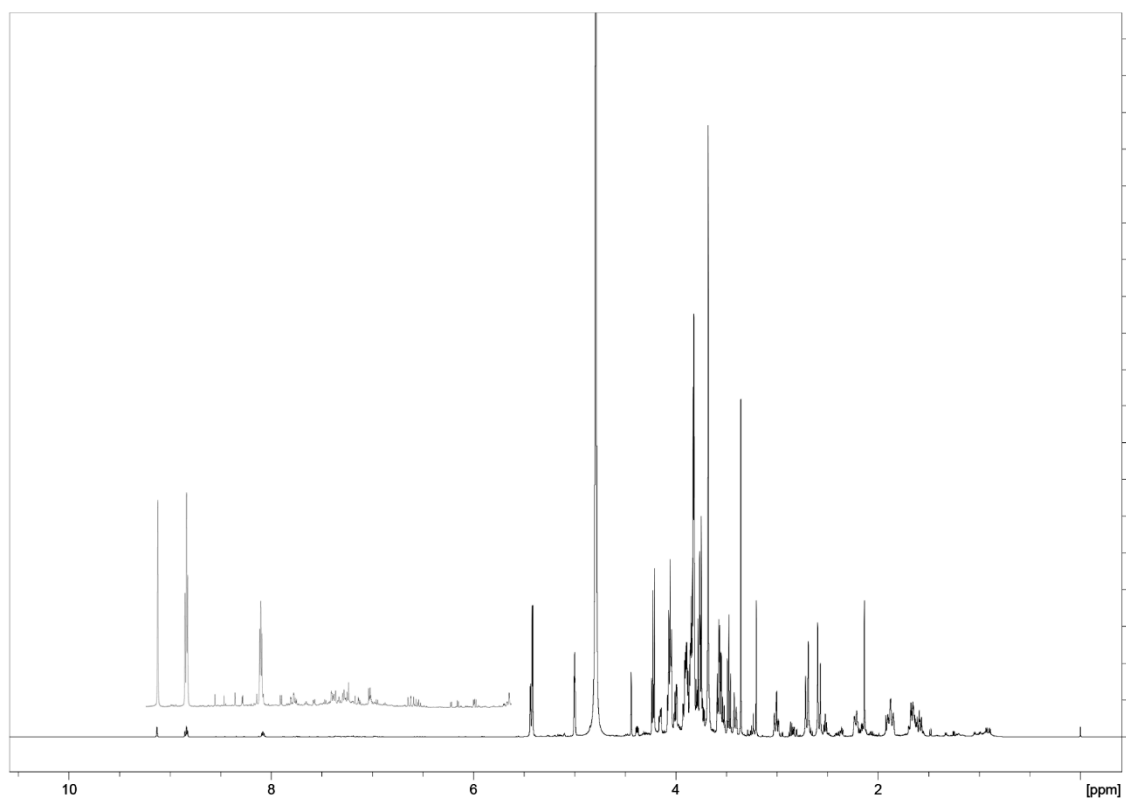

**Figure S1.**  $^1\text{H}$ -NMR spectrum in  $\text{D}_2\text{O}$  of polar extract of *Phaseolus Cannellino* (PCANN) at 600 MHz.

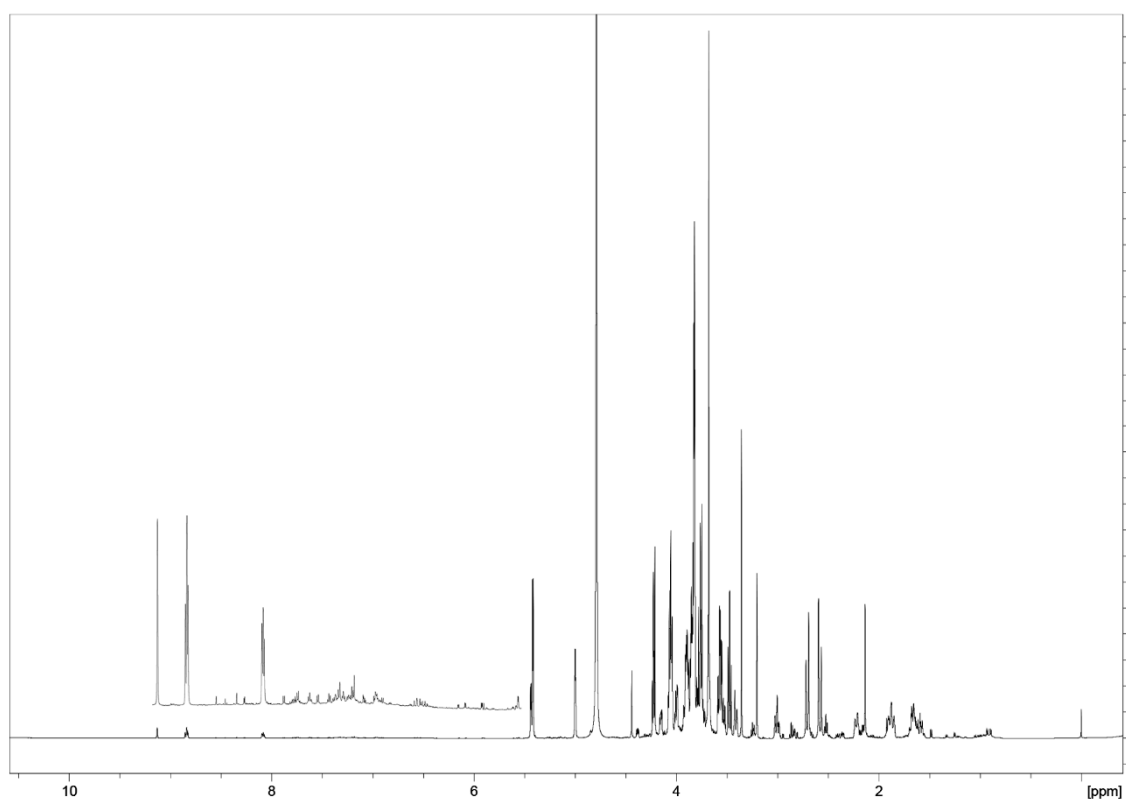

**Figure S2.**  $^1\text{H}$ -NMR spectrum in  $\text{D}_2\text{O}$  of polar extract of *Phaseolus Controne* (PCON) at 600 MHz.

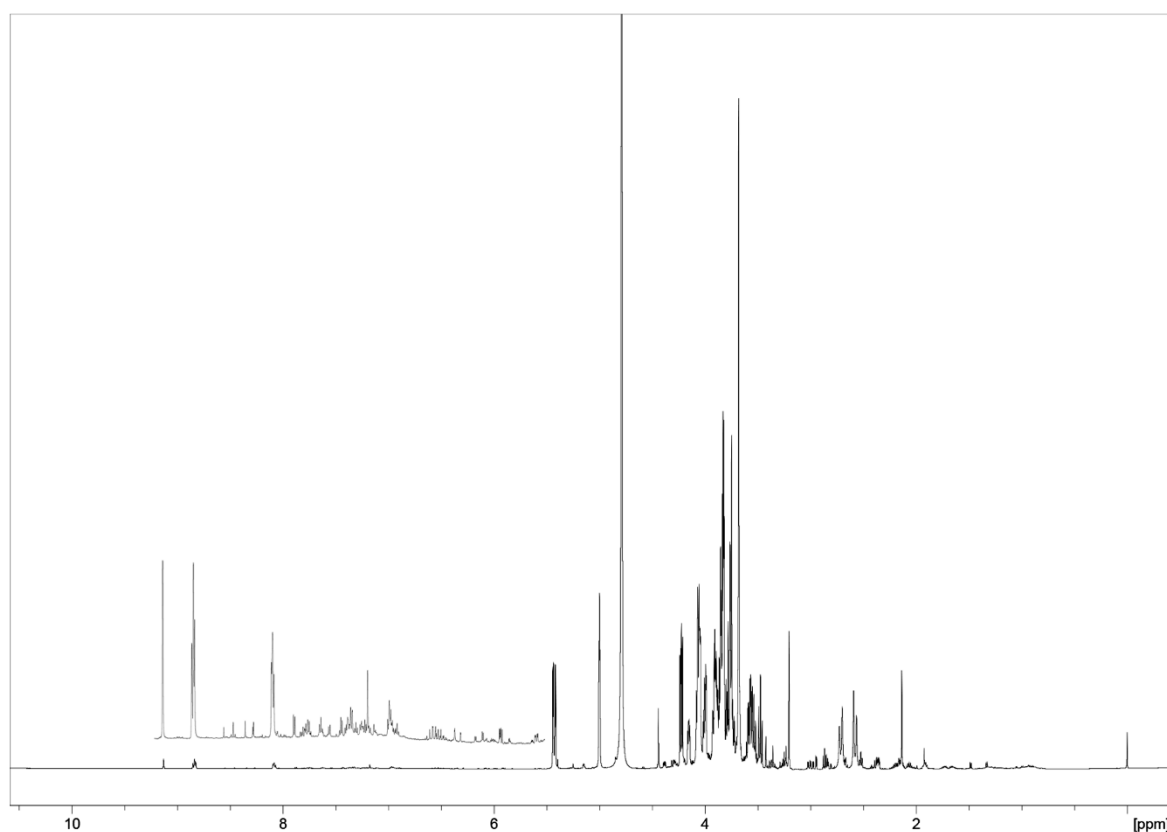

**Figure S3.**  $^1\text{H}$ -NMR spectrum in  $\text{D}_2\text{O}$  of polar extract of *Phaseolus* Occhio Nero (PON) at 600 MHz.

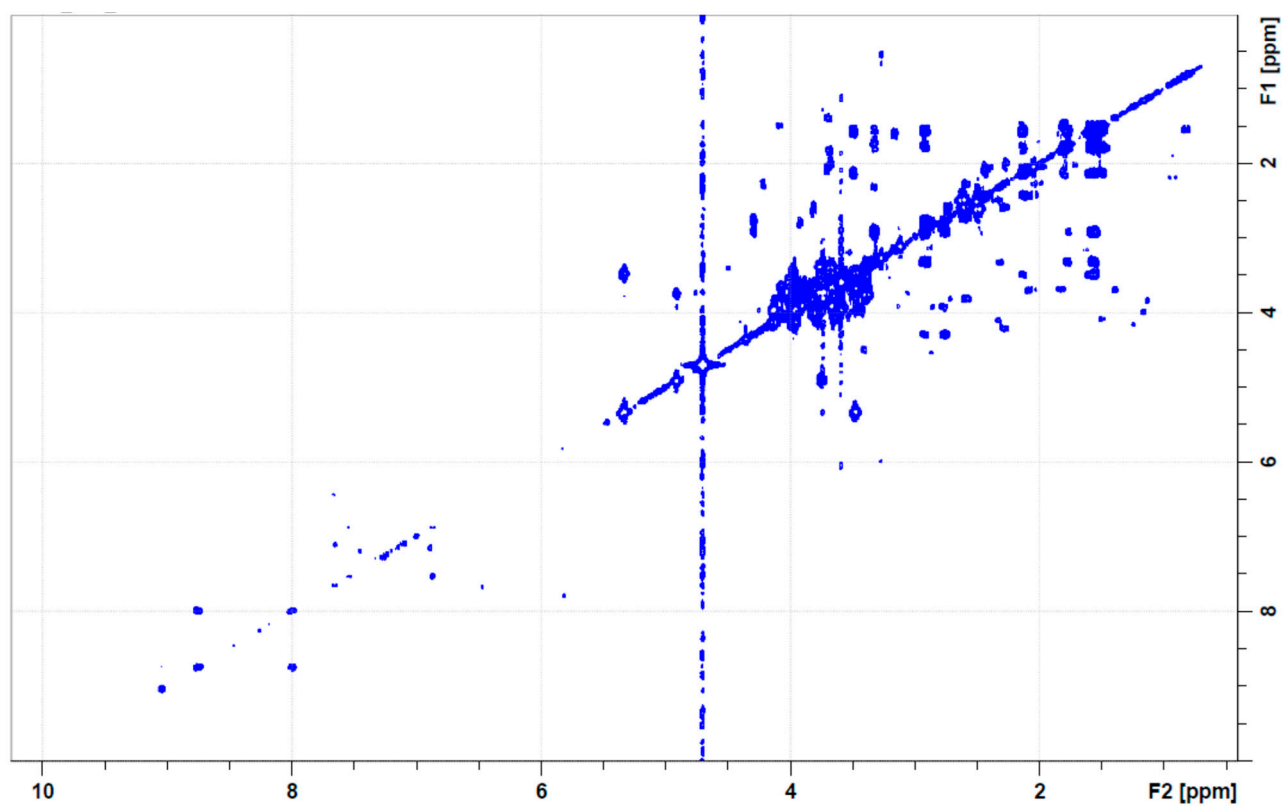

**Figure S4.**  $^1\text{H}$ - $^1\text{H}$ -COSY NMR spectrum in  $\text{D}_2\text{O}$  of polar extract of *Phaseolus* Vellutina (PVEL) at 600 MHz.

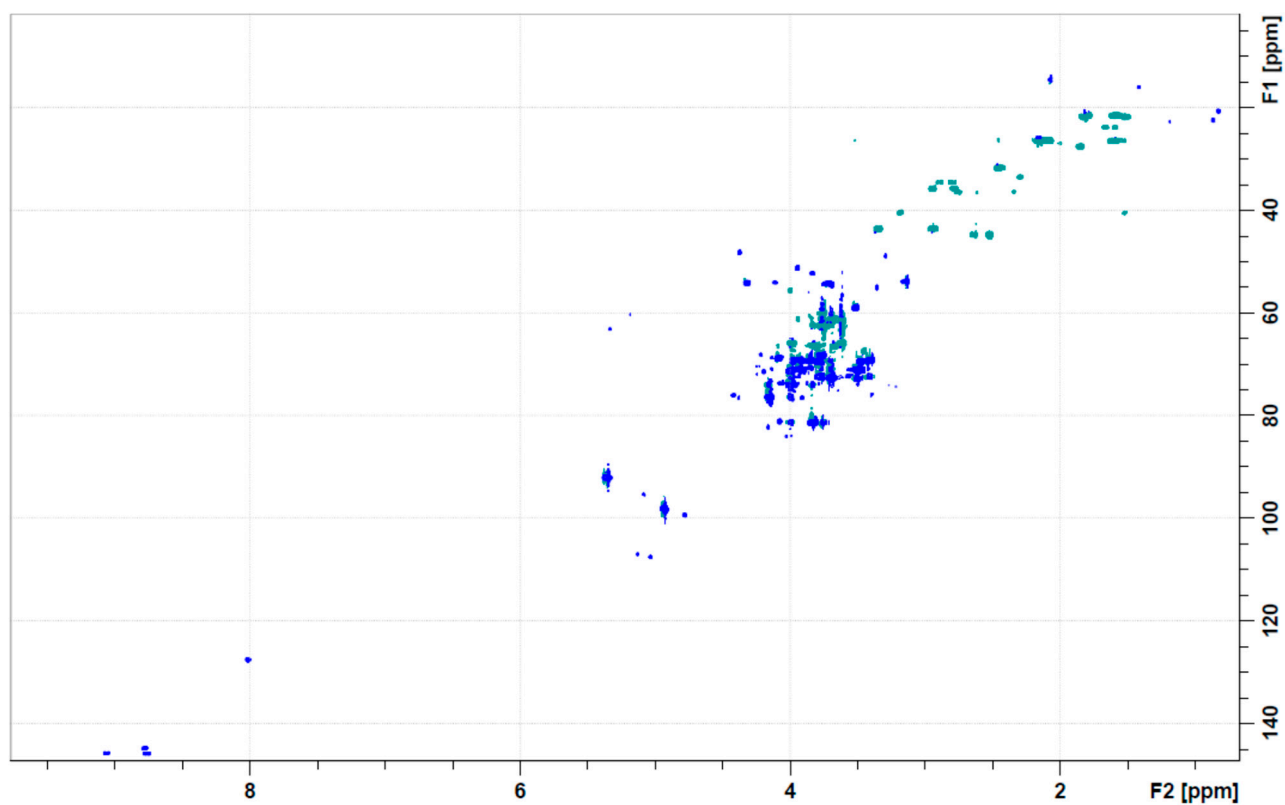

**Figure S5.** HSQC spectrum in D<sub>2</sub>O of polar extract of *Phaseolus Vellutina* (PVEL) at 600 MHz.

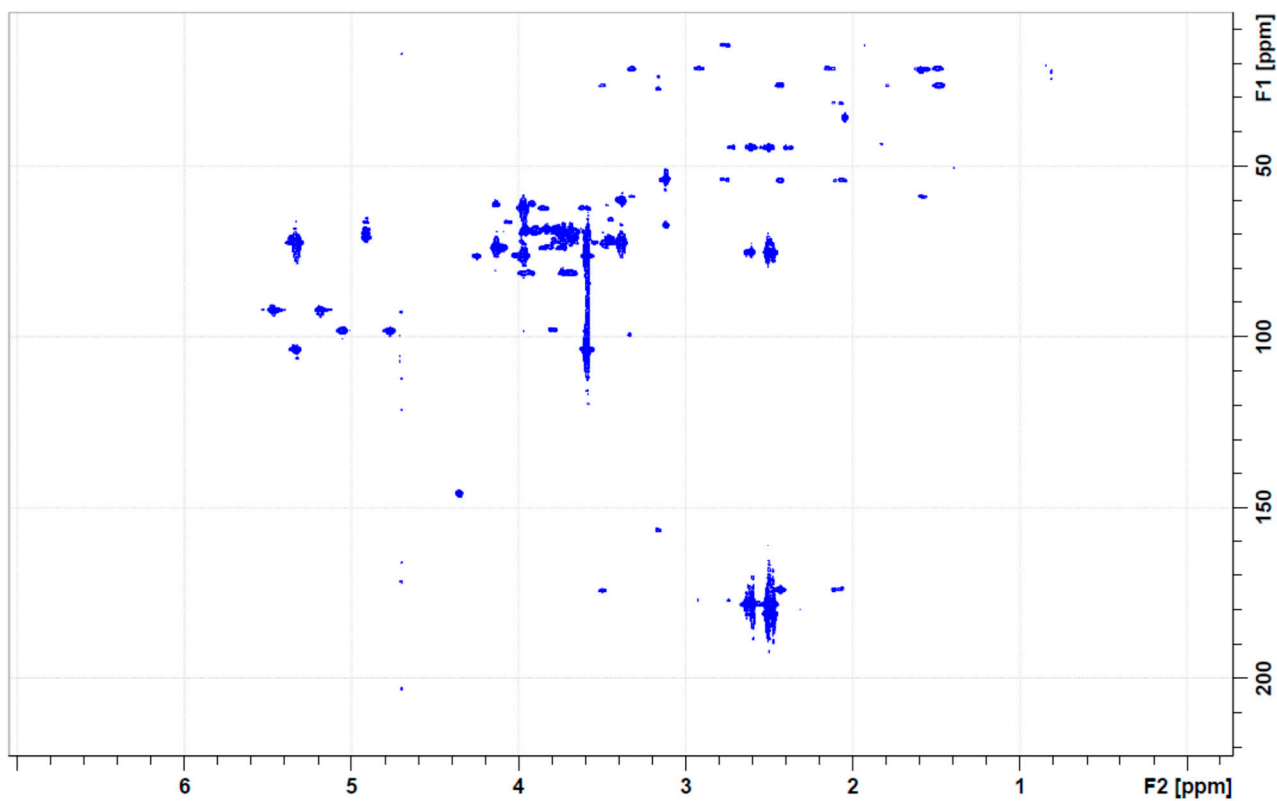

**Figure S6.** HMBC spectrum in D<sub>2</sub>O of polar extract of *Phaseolus Vellutina* (PVEL) at 600 MHz.

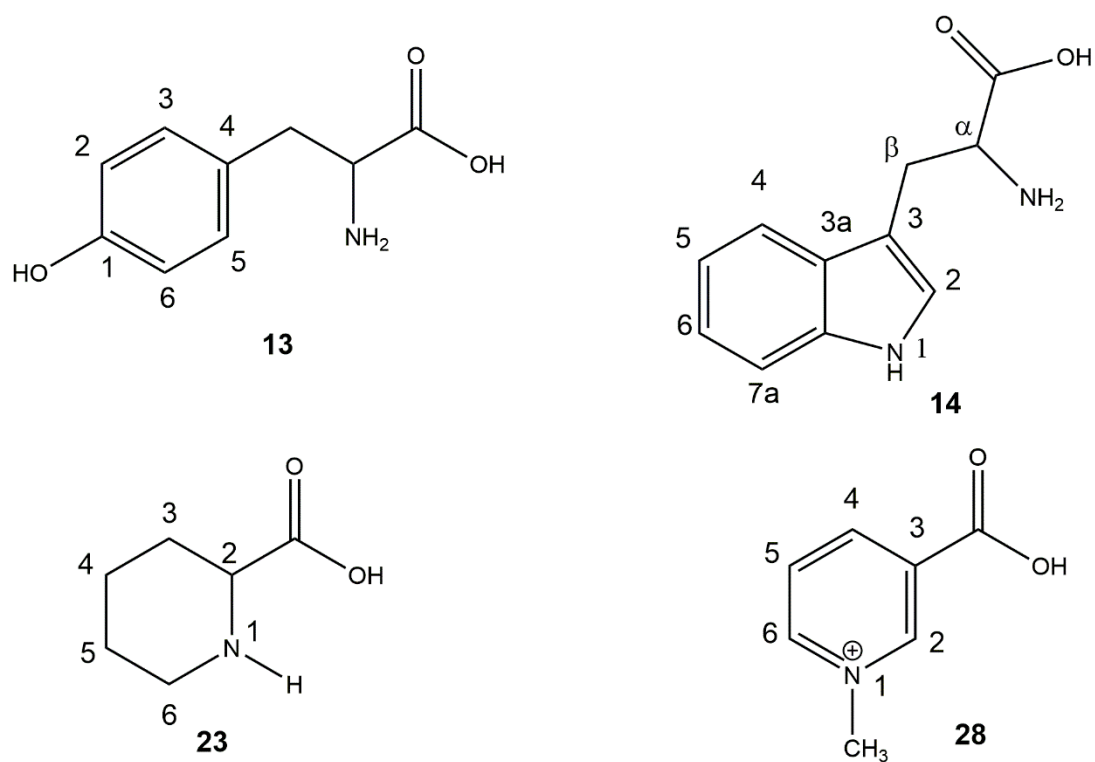

**Figure S7.** Chemical structure of selected metabolites of both polar and apolar extract of *Phaseolus* seeds, namely Tyrosine (**13**, Tyr), Tryptophan (**14**, Trp), Pipecolic acid (**23**, Pip) and Trigonelline (**28**, Tri).

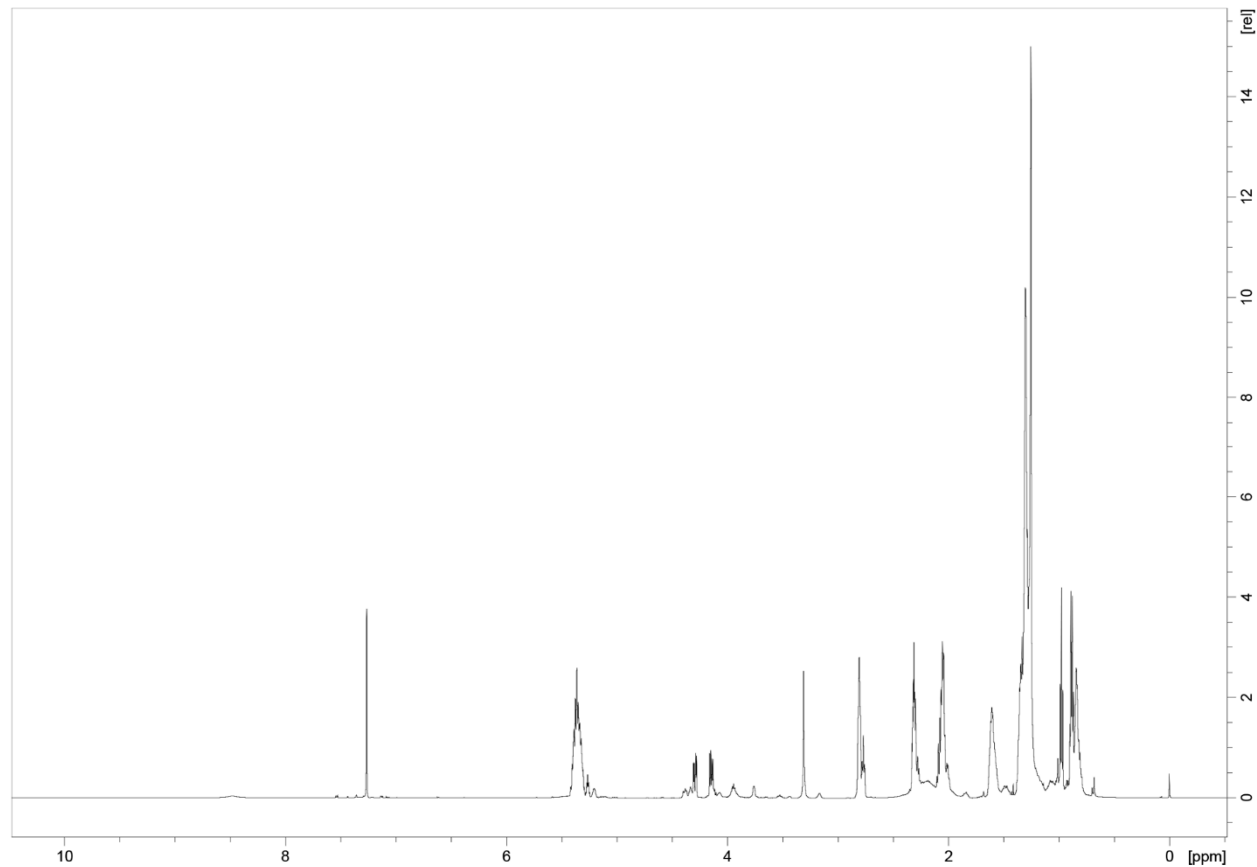

**Figure S8.** <sup>1</sup>H-NMR spectrum in CDCl<sub>3</sub> of apolar extract of *Phaseolus* Cannellino (PCANN) at 600 MHz.

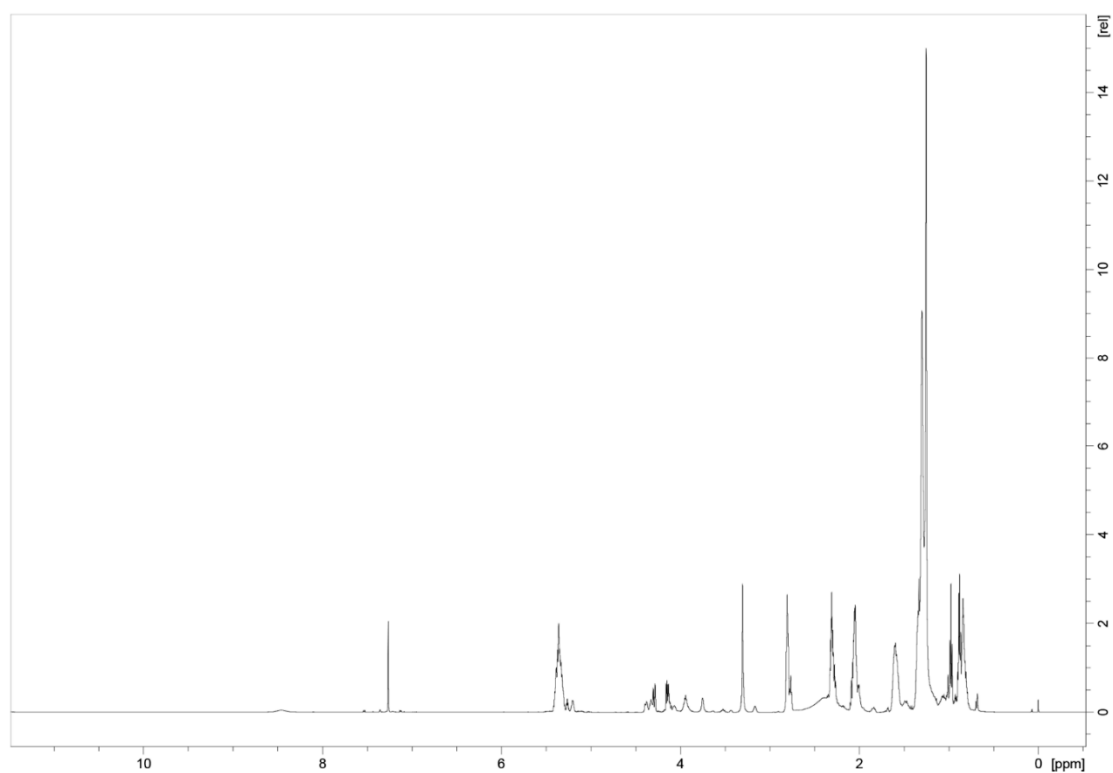

**Figure S9.**  $^1\text{H}$ -NMR spectrum in  $\text{CDCl}_3$  of apolar extract of *Phaseolus Controne* (PCON) at 600 MHz.

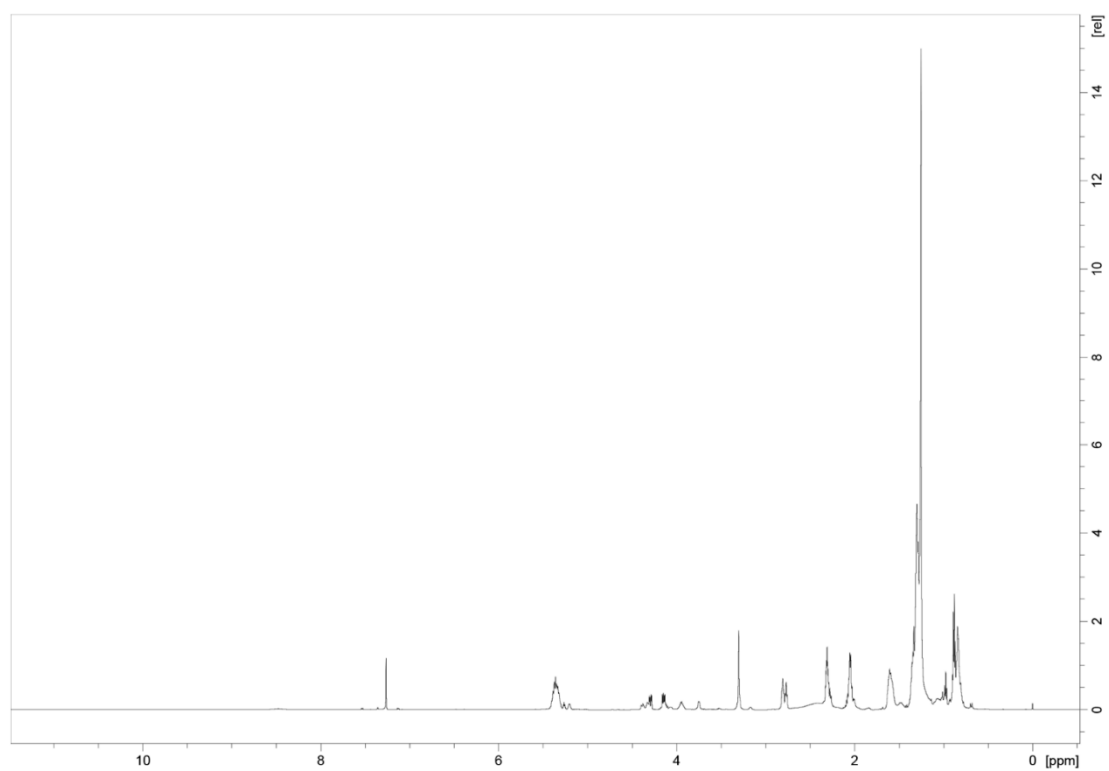

**Figure S10.**  $^1\text{H}$ -NMR spectrum in  $\text{CDCl}_3$  of apolar extract of *Phaseolus Occhio Nero* (PON) at 600 MHz.

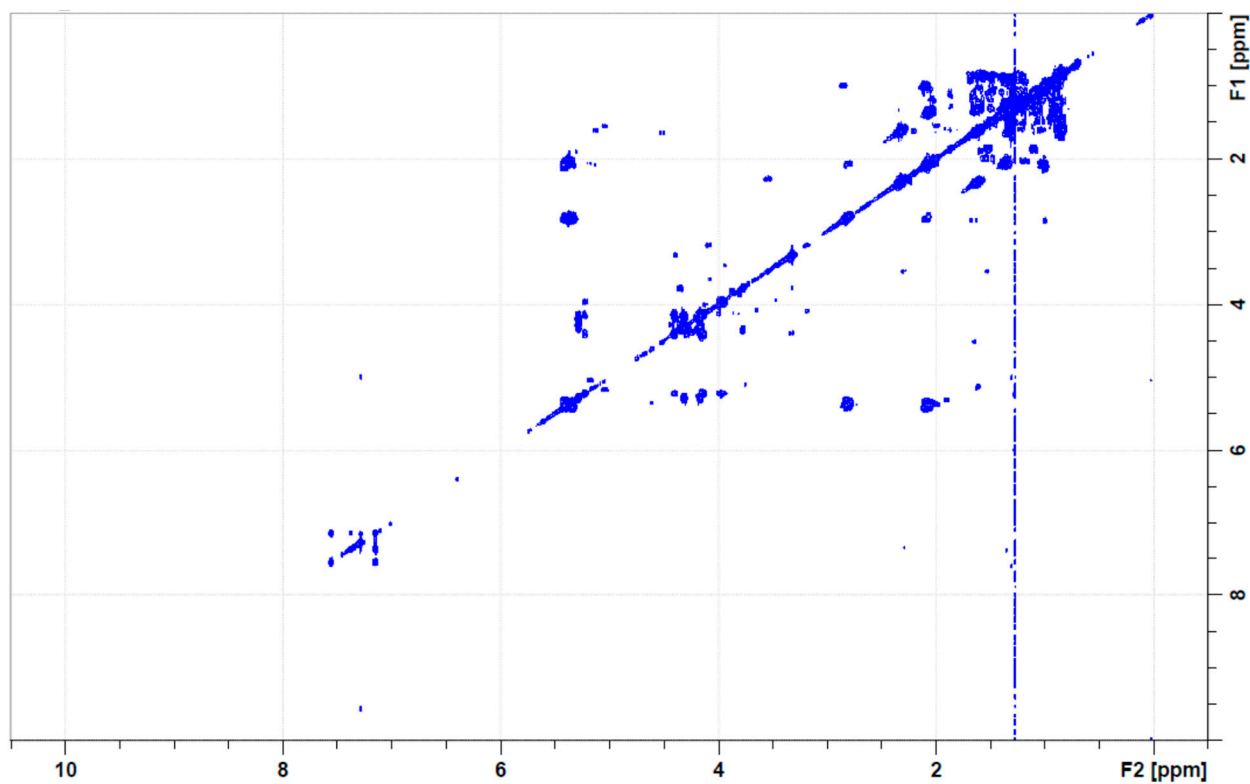

**Figure S11.**  $^1\text{H}$ - $^1\text{H}$ -COSY NMR spectrum in  $\text{CDCl}_3$  of apolar extract of *Phaseolus Vellutina* (PVEL) at 600 MHz.

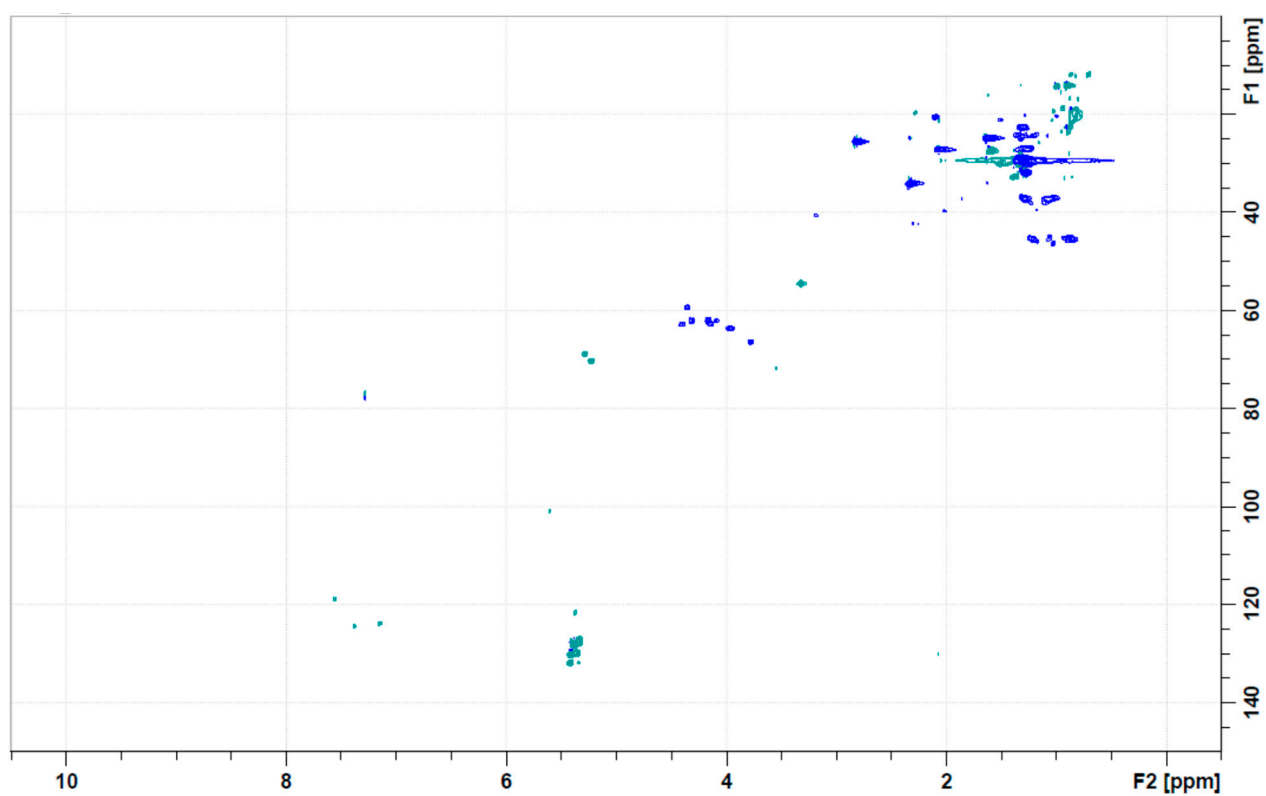

**Figure S12.** HSQC spectrum in  $\text{CDCl}_3$  of apolar extract of *Phaseolus Vellutina* (PVEL) at 600 MHz



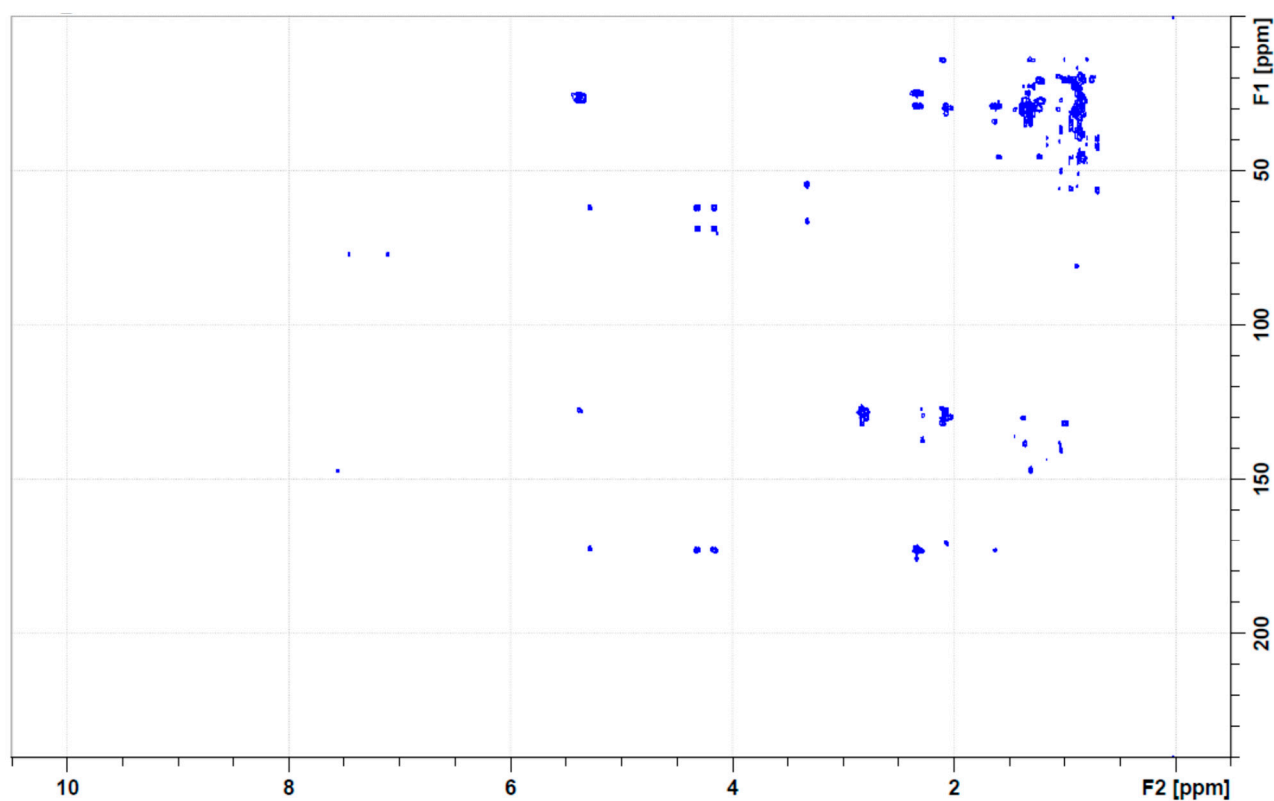

**Figure S13.** HMBC spectrum in  $\text{CDCl}_3$  of apolar extract of *Phaseolus Vellutina* (PVEL) at 600 MHz.

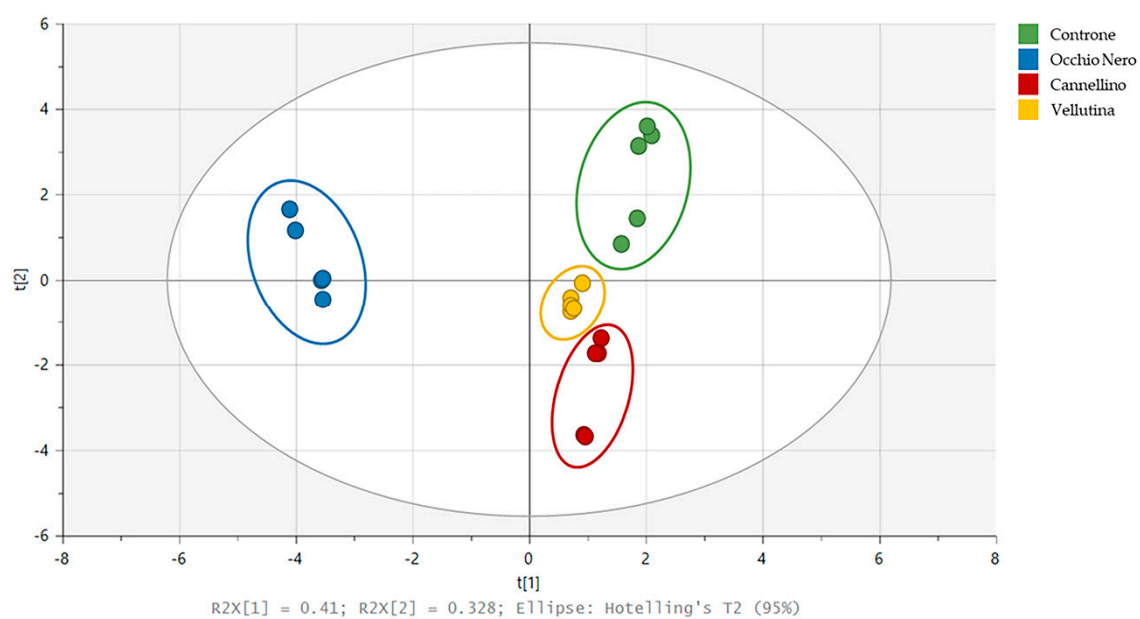

**Figure S14.** 2D representation of Principal Component Analysis (PCA) of polar extracts of bean varieties. PCANN (red), PCON (green), PVEL (yellow) and PON (blue) are separated in the score plot.

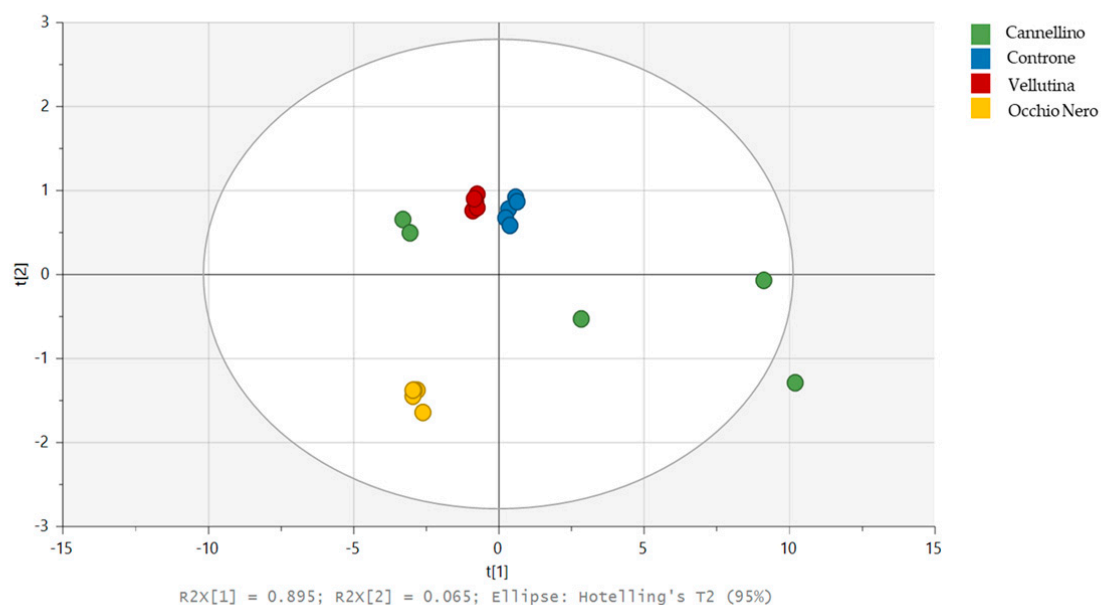

**Figure S15.** Partial Least Square – Discriminant Analysis (PLS-DA) of the selected metabolites of polar extracts.

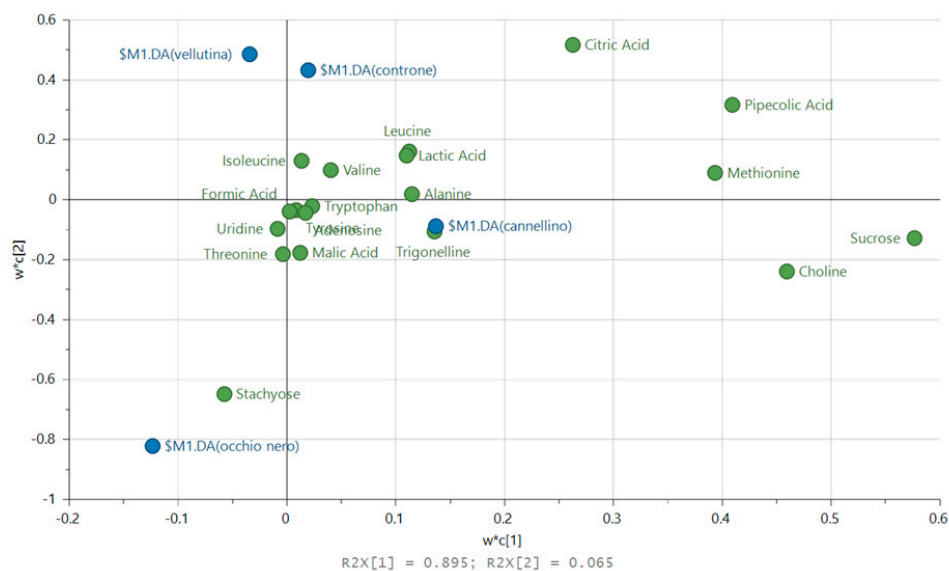

**Figure S16.** Loading Plot of PLS-DA.

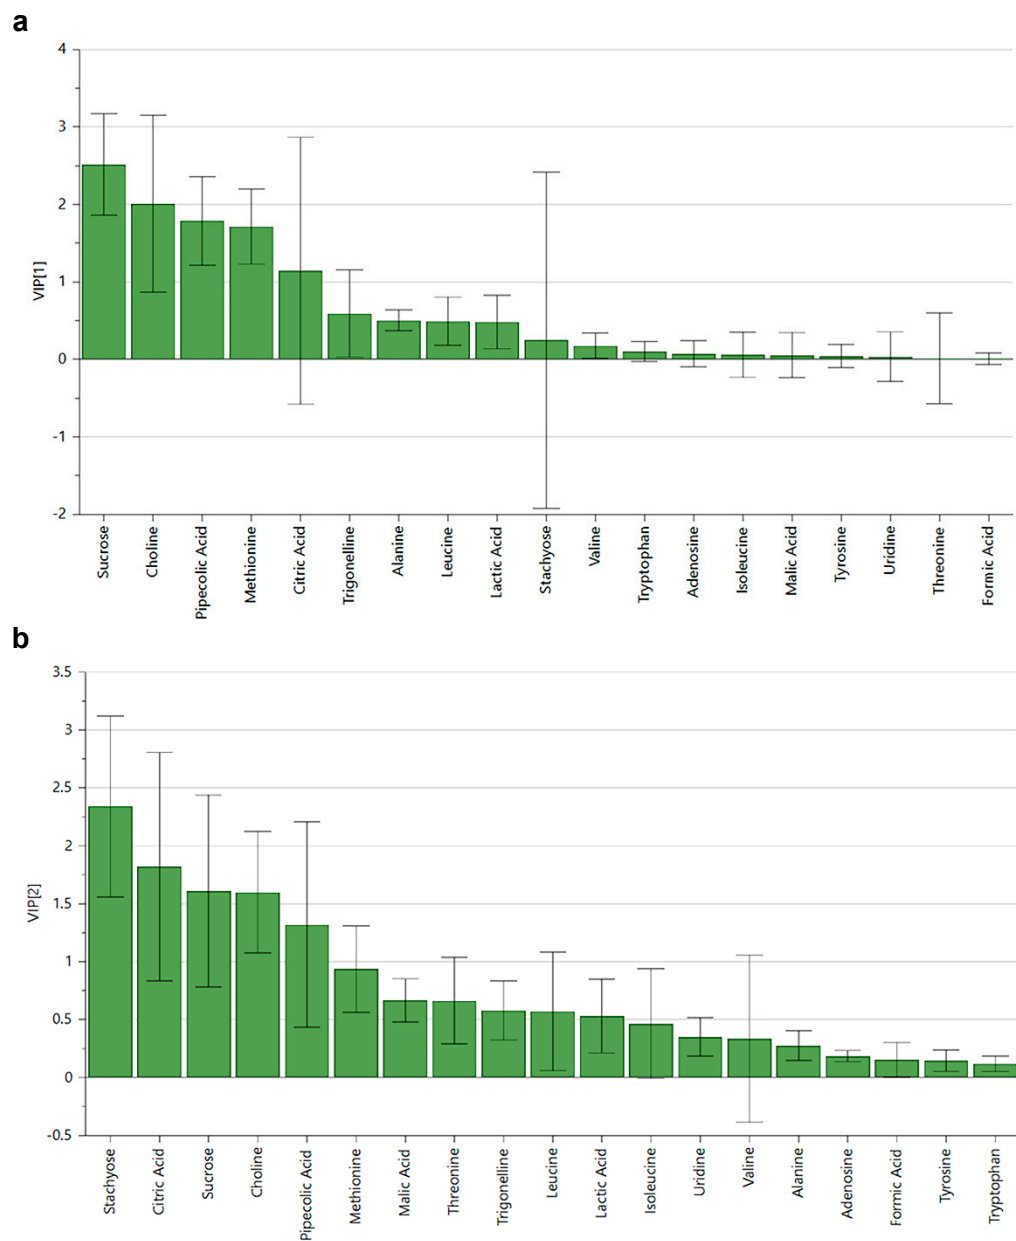

**Figure S17.** a) Variable Importance in Projection on component 1. b) Variable Importance in Projection on component 2.
